# Supplementary material for: Genetic Markers for Thrombophilia and Cardiovascular Disease Associated with Multiple Sclerosis
Source: MDPI journal article supplement (doi:10.3390/biomedicines10102665), 2022-10-21
Supplement: s1 [file s1]

Supplementary Table S1: Demographic and laboratory findings of healthy controls (HC) for thrombophilia risk factors

| No    | Age | Gender | Factor V Leiden (R506Q) | Factor V R2 (H1299R) | Prothrombin (20210G>A) | Factor XIII V34L | beta-Fibrinogen -455 G>A | Human Platelet Antigen 1 (HPA-1) a/b |
|-------|-----|--------|-------------------------|----------------------|------------------------|------------------|--------------------------|--------------------------------------|
| HC-1  | 39  | F      | —                       | —                    | —                      | —                | —                        | a/a                                  |
| HC-2  | 26  | M      | Heterozygous            | —                    | —                      | Heterozygous     | Heterozygous             | a/a                                  |
| HC-3  | 30  | F      | —                       | —                    | —                      | —                | —                        | a/b                                  |
| HC-4  | 43  | M      | —                       | —                    | —                      | —                | —                        | a/a                                  |
| HC-5  | 55  | M      | —                       | —                    | —                      | Heterozygous     | Heterozygous             | a/b                                  |
| HC-6  | 51  | F      | —                       | —                    | —                      | Heterozygous     | —                        | a/a                                  |
| HC-7  | 45  | F      | —                       | —                    | —                      | —                | —                        | a/b                                  |
| HC-8  | 34  | F      | —                       | —                    | —                      | Heterozygous     | Heterozygous             | a/a                                  |
| HC-9  | 30  | M      | —                       | —                    | —                      | Heterozygous     | Heterozygous             | a/a                                  |
| HC-10 | 47  | M      | —                       | Heterozygous         | —                      | Heterozygous     | —                        | a/a                                  |
| HC-11 | 44  | F      | Heterozygous            | —                    | —                      | —                | —                        | a/b                                  |
| HC-12 | 30  | F      | —                       | —                    | —                      | Heterozygous     | —                        | a/b                                  |
| HC-13 | 50  | M      | Heterozygous            | —                    | —                      | Homozygous       | Heterozygous             | a/a                                  |
| HC-14 | 54  | F      | —                       | —                    | —                      | Heterozygous     | —                        | a/b                                  |
| HC-15 | 54  | F      | —                       | —                    | —                      | —                | —                        | b/b                                  |
| HC-16 | 26  | F      | —                       | —                    | —                      | —                | —                        | a/a                                  |
| HC-17 | 46  | F      | —                       | —                    | —                      | Heterozygous     | Heterozygous             | a/a                                  |
| HC-18 | 21  | F      | —                       | Heterozygous         | —                      | Heterozygous     | —                        | a/a                                  |
| HC-19 | 39  | M      | —                       | —                    | —                      | —                | —                        | a/b                                  |
| HC-20 | 50  | F      | —                       | Heterozygous         | —                      | —                | —                        | a/a                                  |
| HC-21 | 36  | M      | —                       | —                    | —                      | —                | Heterozygous             | a/a                                  |
| HC-22 | 44  | F      | —                       | —                    | —                      | —                | Heterozygous             | a/a                                  |
| HC-23 | 42  | F      | —                       | —                    | —                      | Heterozygous     | —                        | a/a                                  |
| HC-24 | 51  | F      | —                       | Heterozygous         | —                      | Heterozygous     | Heterozygous             | a/a                                  |
| HC-25 | 31  | M      | —                       | —                    | —                      | —                | —                        | a/a                                  |

Supplementary Table S2: Demographic and laboratory findings of healthy controls (HC) for cardiovascular risk factors

| No    | Age | Gender | Plasminogen activator inhibitor 1 (PAI-1) 4G/5G | Methylenetetrahydrofolate reductase (MTHFR) 677C>T | Methylenetetrahydrofolate reductase (MTHFR) 1298A>C | Angiotensin-Converting Enzyme (ACE) I/D | Apolipoprotein B (Apo) B R3500Q |
|-------|-----|--------|-------------------------------------------------|----------------------------------------------------|-----------------------------------------------------|-----------------------------------------|---------------------------------|
| HC-1  | 39  | F      | 4G/4G                                           | —                                                  | Homozygous                                          | I/D                                     | —                               |
| HC-2  | 26  | M      | 4G/4G                                           | Heterozygous                                       | —                                                   | D/D                                     | —                               |
| HC-3  | 30  | F      | 4G/5G                                           | —                                                  | Heterozygous                                        | D/D                                     | —                               |
| HC-4  | 43  | M      | 4G/4G                                           | —                                                  | Heterozygous                                        | I/I                                     | —                               |
| HC-5  | 55  | M      | 4G/4G                                           | Homozygous                                         | —                                                   | D/D                                     | —                               |
| HC-6  | 51  | F      | 4G/5G                                           | —                                                  | —                                                   | I/D                                     | —                               |
| HC-7  | 45  | F      | 4G/5G                                           | Heterozygous                                       | Heterozygous                                        | I/D                                     | —                               |
| HC-8  | 34  | F      | 5G/5G                                           | Heterozygous                                       | —                                                   | D/D                                     | —                               |
| HC-9  | 30  | M      | 4G/5G                                           | —                                                  | Heterozygous                                        | I/D                                     | —                               |
| HC-10 | 47  | M      | 4G/4G                                           | —                                                  | Heterozygous                                        | D/D                                     | —                               |
| HC-11 | 44  | F      | 4G/5G                                           | Heterozygous                                       | —                                                   | I/D                                     | —                               |
| HC-12 | 30  | F      | 4G/5G                                           | Homozygous                                         | —                                                   | D/D                                     | —                               |
| HC-13 | 50  | M      | 4G/5G                                           | Heterozygous                                       | Heterozygous                                        | D/D                                     | —                               |
| HC-14 | 54  | F      | 4G/5G                                           | —                                                  | —                                                   | D/D                                     | —                               |
| HC-15 | 54  | F      | 5G/5G                                           | —                                                  | Homozygous                                          | I/I                                     | —                               |
| HC-16 | 26  | F      | 4G/4G                                           | —                                                  | Homozygous                                          | I/I                                     | —                               |
| HC-17 | 46  | F      | 4G/5G                                           | Heterozygous                                       | Heterozygous                                        | I/D                                     | —                               |
| HC-18 | 21  | F      | 4G/5G                                           | —                                                  | Heterozygous                                        | I/D                                     | —                               |
| HC-19 | 39  | M      | 4G/5G                                           | Homozygous                                         | —                                                   | D/D                                     | —                               |
| HC-20 | 50  | F      | 4G/4G                                           | Heterozygous                                       | Heterozygous                                        | I/D                                     | —                               |
| HC-21 | 36  | M      | 4G/5G                                           | —                                                  | —                                                   | D/D                                     | —                               |
| HC-22 | 44  | F      | 5G/5G                                           | Heterozygous                                       | Heterozygous                                        | D/D                                     | —                               |
| HC-23 | 42  | F      | 4G/4G                                           | Heterozygous                                       | Heterozygous                                        | I/D                                     | —                               |
| HC-24 | 51  | F      | 4G/5G                                           | —                                                  | Heterozygous                                        | I/I                                     | —                               |
| HC-25 | 31  | M      | 4G/5G                                           | Homozygous                                         | —                                                   | D/D                                     | —                               |

Supplementary Table S3: Demographic, clinical, and laboratory findings of patients with multiple sclerosis (MS)

| No    | Age | Gender | Disease course | Disease duration | EDSS | MSSS | IgG antibodies against coagulation components |
|-------|-----|--------|----------------|------------------|------|------|-----------------------------------------------|
| MS-1  | 56  | M      | RRMS           | 33               | 8.0  | 8.47 | anti-FXa                                      |
| MS-2  | 80  | M      | SPMS           | 28               | 6.0  | 4.54 | anti-plasmin                                  |
| MS-3  | 71  | F      | SPMS           | 29               | 5.0  | 3.01 | anti-FXII, anti-protein C                     |
| MS-4  | 57  | F      | RRMS           | 23               | 4.0  | 2.78 | anti-FXa                                      |
| MS-5  | 47  | F      | RRMS           | 27               | 1.0  | 0.22 | anti-FXII                                     |
| MS-6  | 59  | F      | RRMS           | 30               | 2.5  | 1.19 | anti-FVIIa                                    |
| MS-7  | 50  | M      | RRMS           | 17               | 2.5  | 1.77 | anti-plasmin                                  |
| MS-8  | 58  | M      | SPMS           | 24               | 6.0  | 5.03 | anti-plasmin                                  |
| MS-9  | 56  | M      | RRMS           | 33               | 5.5  | 3.50 | anti-FVIIa, anti-plasmin                      |
| MS-10 | 47  | F      | SPMS           | 21               | 4.0  | 2.97 | anti-plasmin, anti-FXa, anti-FXII             |
| MS-11 | 65  | F      | RRMS           | 25               | 3.0  | 1.56 | anti-plasmin, anti-FXa                        |
| MS-12 | 46  | F      | RRMS           | 19               | 3.5  | 2.50 | anti-FXII                                     |
| MS-13 | 67  | M      | RRMS           | 22               | 4.0  | 2.82 | anti-FXII                                     |
| MS-14 | 36  | F      | RRMS           | 19               | 2.0  | 1.00 | anti-FVIIa                                    |
| MS-15 | 74  | M      | SPMS           | 20               | 6.5  | 6.43 | anti-plasmin                                  |
| MS-16 | 71  | F      | PPMS           | 20               | 5.5  | 4.30 | anti-FVIIa, anti-plasmin                      |
| MS-17 | 40  | F      | RRMS           | 19               | 4.0  | 3.19 | anti-FVIIa                                    |
| MS-18 | 51  | F      | RRMS           | 21               | 5.5  | 4.21 | anti-prothrombin                              |
| MS-19 | 60  | F      | RRMS           | 19               | 5.5  | 4.49 | anti-plasmin                                  |
| MS-20 | 63  | M      | SPMS           | 18               | 7.5  | 8.23 | anti-plasmin                                  |
| MS-21 | 80  | M      | RRMS           | 25               | 5.5  | 3.74 | anti-plasmin                                  |
| MS-22 | 45  | F      | RRMS           | 17               | 3.0  | 2.30 | anti-plasmin, anti-FXa, anti-thrombin         |
| MS-23 | 47  | M      | RRMS           | 17               | 4.0  | 3.65 | anti-FXII                                     |
| MS-24 | 54  | M      | RRMS           | 13               | 4.0  | 4.38 | anti-FVIIa, anti-prothrombin                  |
| MS-25 | 44  | F      | RRMS           | 17               | 3.0  | 2.30 | anti-thrombin                                 |

Supplementary Table S3: Demographic, clinical, and laboratory findings of patients with multiple sclerosis (MS)

| No    | Age | Gender | Disease course | Disease duration | EDSS | MSSS | IgG antibodies against coagulation components             |
|-------|-----|--------|----------------|------------------|------|------|-----------------------------------------------------------|
| MS-26 | 33  | M      | RRMS           | 13               | 3.0  | 3.05 | anti-plasmin, anti-prothrombin, anti-FXII, anti-protein C |
| MS-27 | 52  | M      | RRMS           | 12               | 2.5  | 2.64 | anti-FVIIa                                                |
| MS-28 | 30  | F      | RRMS           | 11               | 3.0  | 3.46 | anti-FXa                                                  |
| MS-29 | 52  | F      | RRMS           | 12               | 2.5  | 2.64 | anti-prothrombin                                          |
| MS-30 | 50  | F      | SPMS           | 12               | 5.5  | 6.03 | anti-Fxa                                                  |
| MS-31 | 62  | M      | SPMS           | 10               | 7.0  | 8.92 | anti-FXII                                                 |
| MS-32 | 60  | F      | RRMS           | 10               | 2.5  | 3.10 | anti-protein C                                            |
| MS-33 | 39  | F      | RRMS           | 10               | 3.0  | 3.79 | anti-prothrombin                                          |
| MS-34 | 45  | F      | RRMS           | 6                | 4.0  | 6.61 | anti-plasmin                                              |
| MS-35 | 29  | F      | RRMS           | 6                | 2.5  | 4.55 | anti-FVIIa                                                |
| MS-36 | 45  | F      | RRMS           | 9                | 5.0  | 6.50 | anti-thrombin                                             |
| MS-37 | 30  | M      | RRMS           | 0                | 1.0  | —    | anti-prothrombin                                          |
| MS-38 | 43  | F      | RRMS           | 5                | 3.0  | 5.79 | anti-FXa                                                  |
| MS-39 | 37  | M      | RRMS           | 7                | 1.5  | 2.10 | anti-thrombin                                             |
| MS-40 | 39  | F      | RRMS           | 2                | 3.0  | 6.81 | anti-FXa, anti-protein C                                  |
| MS-41 | 33  | F      | RRMS           | 11               | 2.5  | 2.82 | anti-FXa, anti-protein C                                  |
| MS-42 | 46  | F      | RRMS           | 15               | 2.0  | 1.64 | anti-FVIIa                                                |
| MS-43 | 46  | M      | RRMS           | 4                | 1.0  | 1.45 | anti-FVIIa                                                |
| MS-44 | 34  | M      | RRMS           | 3                | 2.0  | 4.82 | anti-FXII                                                 |
| MS-45 | 36  | M      | RRMS           | 11               | 3.5  | 4.21 | anti-FVIIa                                                |
| MS-46 | 30  | F      | RRMS           | 4                | 3.0  | 6.24 | anti-thrombin                                             |
| MS-47 | 23  | M      | RRMS           | 4                | 2.5  | 5.41 | anti-prothrombin                                          |
| MS-48 | 57  | F      | RRMS           | 12               | 8.0  | 9.43 | anti-plasmin, anti-FXa, anti-protein C, anti-thrombin     |

Supplementary Table S4: Laboratory findings of patients with multiple sclerosis (MS) for thrombophilia risk factors

| No    | Factor V Leiden (R506Q) | Factor V R2 (H1299R) | Prothrombin (20210G>A) | Factor XIII V34L | beta-Fibrinogen - 455 G>A | Human Platelet Antigen 1 (HPA-1) a/b |
|-------|-------------------------|----------------------|------------------------|------------------|---------------------------|--------------------------------------|
| MS-1  | —                       | —                    | —                      | —                | —                         | a/b                                  |
| MS-2  | —                       | —                    | —                      | —                | —                         | a/b                                  |
| MS-3  | —                       | —                    | —                      | —                | Heterozygous              | a/b                                  |
| MS-4  | —                       | —                    | —                      | Heterozygous     | —                         | a/b                                  |
| MS-5  | —                       | Heterozygous         | —                      | —                | Heterozygous              | a/a                                  |
| MS-6  | —                       | —                    | —                      | —                | —                         | a/a                                  |
| MS-7  | Heterozygous            | —                    | —                      | —                | —                         | a/a                                  |
| MS-8  | —                       | —                    | —                      | —                | —                         | a/a                                  |
| MS-9  | —                       | —                    | —                      | Heterozygous     | Heterozygous              | a/a                                  |
| MS-10 | Heterozygous            | —                    | —                      | —                | —                         | a/a                                  |
| MS-11 | —                       | —                    | —                      | Heterozygous     | —                         | a/a                                  |
| MS-12 | Heterozygous            | —                    | —                      | —                | —                         | a/a                                  |
| MS-13 | —                       | —                    | —                      | —                | Heterozygous              | a/a                                  |
| MS-14 | —                       | —                    | —                      | —                | Heterozygous              | a/a                                  |
| MS-15 | —                       | —                    | —                      | Heterozygous     | Heterozygous              | a/b                                  |
| MS-16 | —                       | —                    | —                      | —                | Heterozygous              | a/a                                  |
| MS-17 | —                       | —                    | —                      | —                | Heterozygous              | a/a                                  |
| MS-18 | —                       | Heterozygous         | —                      | —                | Heterozygous              | a/a                                  |
| MS-19 | —                       | Heterozygous         | —                      | —                | Heterozygous              | a/b                                  |
| MS-20 | —                       | —                    | —                      | Heterozygous     | Heterozygous              | a/a                                  |
| MS-21 | —                       | —                    | —                      | —                | —                         | a/a                                  |
| MS-22 | Heterozygous            | —                    | —                      | —                | Heterozygous              | a/a                                  |
| MS-23 | —                       | —                    | —                      | —                | —                         | a/a                                  |
| MS-24 | —                       | —                    | —                      | —                | Heterozygous              | a/a                                  |
| MS-25 | —                       | —                    | —                      | Homozygous       | —                         | a/a                                  |

Supplementary Table S4: Laboratory findings of patients with multiple sclerosis (MS) for thrombophilia risk factors

| No    | Factor V Leiden (R506Q) | Factor V R2 (H1299R) | Prothrombin (20210G>A) | Factor XIII V34L | beta-Fibrinogen - 455 G>A | Human Platelet Antigen 1 (HPA-1) a/b |
|-------|-------------------------|----------------------|------------------------|------------------|---------------------------|--------------------------------------|
| MS-26 | —                       | —                    | —                      | Heterozygous     | Homozygous                | a/a                                  |
| MS-27 | —                       | —                    | —                      | —                | —                         | a/a                                  |
| MS-28 | —                       | —                    | —                      | —                | Homozygous                | a/a                                  |
| MS-29 | —                       | —                    | —                      | Heterozygous     | —                         | a/a                                  |
| MS-30 | —                       | —                    | —                      | —                | Heterozygous              | a/b                                  |
| MS-31 | —                       | —                    | —                      | —                | Homozygous                | a/a                                  |
| MS-32 | Heterozygous            | —                    | —                      | —                | Heterozygous              | a/b                                  |
| MS-33 | —                       | —                    | —                      | —                | —                         | a/b                                  |
| MS-34 | —                       | —                    | —                      | —                | —                         | a/b                                  |
| MS-35 | —                       | Heterozygous         | —                      | —                | Heterozygous              | a/b                                  |
| MS-36 | —                       | —                    | —                      | —                | —                         | a/a                                  |
| MS-37 | Heterozygous            | Heterozygous         | —                      | —                | Heterozygous              | a/a                                  |
| MS-38 | Heterozygous            | —                    | —                      | Heterozygous     | —                         | a/a                                  |
| MS-39 | —                       | Heterozygous         | —                      | —                | Heterozygous              | a/a                                  |
| MS-40 | —                       | —                    | —                      | —                | Heterozygous              | a/a                                  |
| MS-41 | —                       | —                    | —                      | —                | —                         | a/b                                  |
| MS-42 | —                       | Heterozygous         | Heterozygous           | —                | —                         | a/a                                  |
| MS-43 | Heterozygous            | Heterozygous         | —                      | Homozygous       | —                         | a/a                                  |
| MS-44 | —                       | —                    | —                      | Heterozygous     | Homozygous                | a/a                                  |
| MS-45 | Heterozygous            | —                    | —                      | —                | Heterozygous              | a/a                                  |
| MS-46 | —                       | —                    | —                      | Heterozygous     | —                         | a/b                                  |
| MS-47 | —                       | —                    | —                      | Heterozygous     | Heterozygous              | a/a                                  |
| MS-48 | —                       | —                    | —                      | Heterozygous     | —                         | a/b                                  |

Supplementary Table S5: Laboratory findings of patients with multiple sclerosis (MS) for cardiovascular risk factors

| No    | Plasminogen activator inhibitor 1 (PAI-1) 4G/5G | Methylenetetrahydrofolate reductase (MTHFR) 677C>T | Methylenetetrahydrofolate reductase (MTHFR) 1298A>C | Angiotensin-Converting Enzyme (ACE) I/D | Apolipoprotein B (Apo) B R3500Q |
|-------|-------------------------------------------------|----------------------------------------------------|-----------------------------------------------------|-----------------------------------------|---------------------------------|
| MS-1  | 4G/5G                                           | Heterozygous                                       | Heterozygous                                        | I/D                                     | —                               |
| MS-2  | 5G/5G                                           | Heterozygous                                       | —                                                   | D/D                                     | —                               |
| MS-3  | 4G/4G                                           | Heterozygous                                       | —                                                   | D/D                                     | —                               |
| MS-4  | 4G/5G                                           | Homozygous                                         | —                                                   | D/D                                     | —                               |
| MS-5  | 5G/5G                                           | Heterozygous                                       | Heterozygous                                        | D/D                                     | —                               |
| MS-6  | 4G/5G                                           | Heterozygous                                       | —                                                   | D/D                                     | —                               |
| MS-7  | 4G/5G                                           | Heterozygous                                       | —                                                   | I/D                                     | —                               |
| MS-8  | 4G/5G                                           | Heterozygous                                       | —                                                   | D/D                                     | —                               |
| MS-9  | 5G/5G                                           | Heterozygous                                       | —                                                   | I/D                                     | —                               |
| MS-10 | 4G/5G                                           | —                                                  | —                                                   | I/D                                     | —                               |
| MS-11 | 5G/5G                                           | Heterozygous                                       | —                                                   | I/D                                     | —                               |
| MS-12 | 4G/5G                                           | —                                                  | —                                                   | I/D                                     | —                               |
| MS-13 | 4G/5G                                           | Heterozygous                                       | —                                                   | I/D                                     | —                               |
| MS-14 | 4G/4G                                           | —                                                  | Homozygous                                          | I/D                                     | —                               |
| MS-15 | 5G/5G                                           | —                                                  | Homozygous                                          | D/D                                     | —                               |
| MS-16 | 4G/4G                                           | Heterozygous                                       | Heterozygous                                        | I/D                                     | —                               |
| MS-17 | 5G/5G                                           | —                                                  | Heterozygous                                        | D/D                                     | —                               |
| MS-18 | 4G/5G                                           | Heterozygous                                       | Heterozygous                                        | I/D                                     | —                               |
| MS-19 | 4G/5G                                           | —                                                  | Heterozygous                                        | I/D                                     | —                               |
| MS-20 | 5G/5G                                           | Heterozygous                                       | Heterozygous                                        | I/I                                     | —                               |
| MS-21 | 4G/4G                                           | Heterozygous                                       | —                                                   | I/D                                     | —                               |
| MS-22 | 4G/4G                                           | Heterozygous                                       | Heterozygous                                        | D/D                                     | —                               |
| MS-23 | 4G/5G                                           | Heterozygous                                       | Heterozygous                                        | I/D                                     | —                               |
| MS-24 | 5G/5G                                           | Heterozygous                                       | Heterozygous                                        | I/D                                     | —                               |
| MS-25 | 4G/5G                                           | Homozygous                                         | —                                                   | D/D                                     | —                               |

Supplementary Table S5: Laboratory findings of patients with multiple sclerosis (MS) for cardiovascular risk factors

| No    | Plasminogen activator inhibitor 1 (PAI-1) 4G/5G | Methylenetetrahydrofolate reductase (MTHFR) 677C>T | Methylenetetrahydrofolate reductase (MTHFR) 1298A>C | Angiotensin-Converting Enzyme (ACE) I/D | Apolipoprotein B (Apo) B R3500Q |
|-------|-------------------------------------------------|----------------------------------------------------|-----------------------------------------------------|-----------------------------------------|---------------------------------|
| MS-26 | 5G/5G                                           | —                                                  | Heterozygous                                        | I/D                                     | —                               |
| MS-27 | 4G/5G                                           | Heterozygous                                       | —                                                   | I/D                                     | —                               |
| MS-28 | 4G/5G                                           | —                                                  | Heterozygous                                        | I/I                                     | —                               |
| MS-29 | 5G/5G                                           | Heterozygous                                       | Heterozygous                                        | D/D                                     | —                               |
| MS-30 | 5G/5G                                           | —                                                  | —                                                   | D/D                                     | —                               |
| MS-31 | 4G/4G                                           | Heterozygous                                       | Heterozygous                                        | I/D                                     | —                               |
| MS-32 | 5G/5G                                           | —                                                  | —                                                   | I/D                                     | —                               |
| MS-33 | 4G/5G                                           | —                                                  | —                                                   | I/D                                     | —                               |
| MS-34 | 4G/5G                                           | Homozygous                                         | —                                                   | D/D                                     | —                               |
| MS-35 | 5G/5G                                           | —                                                  | Heterozygous                                        | D/D                                     | —                               |
| MS-36 | 4G/4G                                           | —                                                  | Heterozygous                                        | I/D                                     | —                               |
| MS-37 | 5G/5G                                           | —                                                  | Heterozygous                                        | D/D                                     | —                               |
| MS-38 | 5G/5G                                           | Heterozygous                                       | Heterozygous                                        | I/I                                     | —                               |
| MS-39 | 5G/5G                                           | Heterozygous                                       | Heterozygous                                        | I/D                                     | —                               |
| MS-40 | 4G/4G                                           | Heterozygous                                       | Heterozygous                                        | D/D                                     | —                               |
| MS-41 | 5G/5G                                           | Heterozygous                                       | Heterozygous                                        | I/D                                     | —                               |
| MS-42 | 4G/5G                                           | —                                                  | Homozygous                                          | I/D                                     | —                               |
| MS-43 | 4G/5G                                           | Homozygous                                         | —                                                   | I/D                                     | —                               |
| MS-44 | 4G/5G                                           | Homozygous                                         | —                                                   | I/D                                     | —                               |
| MS-45 | 5G/5G                                           | —                                                  | Heterozygous                                        | D/D                                     | —                               |
| MS-46 | 4G/5G                                           | —                                                  | Homozygous                                          | I/D                                     | —                               |
| MS-47 | 5G/5G                                           | Heterozygous                                       | —                                                   | D/D                                     | —                               |
| MS-48 | 4G/5G                                           | —                                                  | Heterozygous                                        | D/D                                     | —                               |
